# Supplementary material
Source: publisher site journal article supplement (https://www.spandidos-publications.com/8260/downloadSupplementary)
Supplement: Supplementary file 1 [file downloadSupplementary]

**Table SI.** Role of inflammatory cytokines and immune cells in AM formation and fertility.

| <b>A, Pro-inflammatory cytokines</b> |                         |                                                                                                                                                                                                                                                                       |                                                                                                                                                                                                                                                                                   |                |
|--------------------------------------|-------------------------|-----------------------------------------------------------------------------------------------------------------------------------------------------------------------------------------------------------------------------------------------------------------------|-----------------------------------------------------------------------------------------------------------------------------------------------------------------------------------------------------------------------------------------------------------------------------------|----------------|
| <b>Molecular marker</b>              | <b>Expression in AM</b> | <b>Mechanisms promoting AM formation</b>                                                                                                                                                                                                                              | <b>Role in fertility</b>                                                                                                                                                                                                                                                          | <b>(Refs.)</b> |
| IL-6                                 | Upregulated             | 1. Activates the TLR4/NF- $\kappa$ B, IL-6/JAK2/STAT3, PI3K/AKT/mTOR and RAS/RAF/MEK/ERK pathways;<br>2. Promotes proliferation and invasion;<br>3. Correlates with the severity of dysmenorrhea.                                                                     | 1. Persistent activation of the JAK/STAT3 pathway impairs endometrial receptivity and affects embryo implantation;<br>2. Causes immune and vascular dysfunction at the placental/decidual interface;<br>3. Targeted therapy (such as tocilizumab) may improve pregnancy outcomes. | (1-4)          |
| CXCL8                                | Upregulated             | 1. Activates the CXCL8/CXCR1 axis and FAK/PI3K/AKT signaling pathway;<br>2. Enhances the adhesion and invasive capacity of stromal cells;<br>3. Loss of cyclical expression patterns leads to disordered repair of the eutopic endometrium and aberrant angiogenesis. | 1. Reduced cervical mucus fertilization environment;<br>2. Correlated with oocyte maturation and embryo quality;<br>3. Interferes with blastocyst implantation via CXCR1.                                                                                                         | (5-8)          |
| IL1B                                 | Upregulated             | 1. Activates the TLR/MyD88 pathway;<br>2. Upregulates IL-6, CXCL8, COX-2 and VEGF through the canonical NF- $\kappa$ B pathway.                                                                                                                                       | 1. Disrupts Th17/Treg balance;<br>2. IL-1Ra/IL-1 $\beta$ predicts adverse pregnancy;<br>3. Impairs E2/P-mediated ER;<br>4. Inhibits sperm-zona pellucida binding.                                                                                                                 | (9-13)         |
| COX-2                                | Upregulated             | 1. Promotes proliferation, angiogenesis and immune suppression;<br>2. Activates PGE2/CYP19A1 (estrogen-inflammation loop);<br>3. Serves as a biomarker for dysmenorrhea in patients with AM.                                                                          | 1. Impairs telocyte function;<br>2. Disrupts the gamete transport/implantation microenvironment.                                                                                                                                                                                  | (14-17)        |
| IL-15                                | Upregulated             | 1. Drives endometriosis-associated inflammation.                                                                                                                                                                                                                      | 1. Induces abnormal uNK proliferation and maturation;<br>2. Exacerbates lesion inflammation;<br>3. Causes decidualization defects.                                                                                                                                                | (18,19)        |
| IL22                                 | Upregulated             | 1. Enhances the invasiveness of stromal cells;<br>2. Upregulates the expression of pro-angiogenic factors such as VEGF, IL-6 and IL-8.                                                                                                                                | Serum levels are inversely correlated with the IVF embryo implantation rate.                                                                                                                                                                                                      | (20-22)        |
| NF- $\kappa$ B                       | Upregulated             | 1. A central hub of inflammatory responses regulates multiple pro-inflammatory mediators (such as IL-6, IL-8, TNF- $\alpha$ and COX-2);                                                                                                                               | 1. Alters Th17/Treg cell ratio, affecting trophoblast invasion and angiogenesis in the placenta;<br>2. Downregulates PR-B expression;                                                                                                                                             | (23-26)        |

|                                         |                                             | 2. Modulates inflammation, proliferation, angiogenesis and tissue remodeling.                                                                                                                                                                 | 3. Alters LIF expression.                                                                                                                                                           |                |
|-----------------------------------------|---------------------------------------------|-----------------------------------------------------------------------------------------------------------------------------------------------------------------------------------------------------------------------------------------------|-------------------------------------------------------------------------------------------------------------------------------------------------------------------------------------|----------------|
| <b>B, Anti-inflammatory cytokines</b>   |                                             |                                                                                                                                                                                                                                               |                                                                                                                                                                                     |                |
| <b>Molecular marker</b>                 | <b>Expression in AM</b>                     | <b>Mechanisms promoting AM formation</b>                                                                                                                                                                                                      | <b>Role in fertility</b>                                                                                                                                                            | <b>(Refs.)</b> |
| IL10                                    | Upregulated                                 | 1. Induces HLA-G;<br>2. Downregulates classical class I and class II antigens;<br>3. Suppresses pro-inflammatory cytokines;<br>4. Evades immune surveillance.                                                                                 | 1. Regulates the STAT3/HOXA10 signaling pathway, affecting ER;<br>2. Reduces the levels of uNK cells at the maternal-placental interface, supporting normal pregnancy.              | (27-29)        |
| IL-33                                   | Downregulated                               | Inhibits NF- $\kappa$ B transcriptional activity. Its function in the endometrium is not yet clear.                                                                                                                                           | 1. IL-33/ST2 pathway regulates the expression of HOXA10;<br>2. Affects the decidualization process.                                                                                 | (30)           |
| <b>C, Immune cell-derived cytokines</b> |                                             |                                                                                                                                                                                                                                               |                                                                                                                                                                                     |                |
| <b>Molecular marker</b>                 | <b>Expression in AM</b>                     | <b>Mechanisms promoting AM formation</b>                                                                                                                                                                                                      | <b>Role in fertility</b>                                                                                                                                                            | <b>(Refs.)</b> |
| TGF- $\beta$                            | Upregulated                                 | 1. Activates Smad2/3 phosphorylation;<br>2. Induces EMT, FMT and SMM,<br>3. Promotes collagen synthesis in the ECM;<br>4. Inhibits MMPs, leading to ECM metabolic imbalance.                                                                  | 1. Anti-TGF- $\beta$ 1 therapy can improve fibrosis progression and pregnancy outcomes;<br>2. TGF- $\beta$ 1 may serve as a potential target for improving endometrial receptivity. | (31-33)        |
| IL11                                    | Downregulated                               | 1. Key implantation regulator;<br>2. Together with its receptor, it is downregulated in AM.                                                                                                                                                   | 1. Involved in aberrant gp130 signaling;<br>2. Reduced expression leads to defective decidualization.                                                                               | (34,35)        |
| LIF                                     | Downregulated                               | 1. IL-6 cytokine family member;<br>2. Regulates decidualization and endometrial receptivity.                                                                                                                                                  | Mediates blastocyst development, decidualization and trophoblast differentiation                                                                                                    | (36)           |
| <b>D, Immunocytes</b>                   |                                             |                                                                                                                                                                                                                                               |                                                                                                                                                                                     |                |
| <b>Molecular marker</b>                 | <b>Expression in AM</b>                     | <b>Mechanisms promoting AM formation</b>                                                                                                                                                                                                      | <b>Role in fertility</b>                                                                                                                                                            | <b>(Refs.)</b> |
| Macrophages                             | M1 are downregulated and M2 are upregulated | 1. Imbalance in M1/M2 macrophage phenotypes;<br>2. M2 secretes IL-10, TGF- $\beta$ and other factors;<br>3. Promote angiogenesis and proliferation of ectopic lesions;<br>4. CCL2/CCR2 axis, miR-301a-3p and EV-LGMNP1 drive M2 polarization. | 1. Disrupt maternal-fetal interface in pro-inflammatory microenvironments;<br>2. Impair LIF production;<br>3. Affect endometrial receptivity.                                       | (17,37-40)     |

|            |             |                                                                                                                              |                                                                                                                                      |         |
|------------|-------------|------------------------------------------------------------------------------------------------------------------------------|--------------------------------------------------------------------------------------------------------------------------------------|---------|
| NK cells   | Upregulated | 1. Increases uNK cells count;<br>2. Reduces expression of KIRs.                                                              | 1. Linked to recurrent miscarriage/implantation failure;<br>2. Mediates spiral artery/placental development.                         | (41-43) |
| Mast cells | Upregulated | 1. Releases TGF- $\beta$ 1 and FGF;<br>2. Promotes disease progression.                                                      | No clear reports are available.                                                                                                      | (44)    |
| T cells    | Upregulated | Elevated T cell subsets (CD3 <sup>+</sup> T cells and CD4 <sup>+</sup> and CD8 <sup>+</sup> T cells) in eutopic endometrium. | 1. Imbalance in the Th17/Treg ratio weakens the maternal-fetal immune tolerance;<br>2. Increases implantation immune rejection risk. | (45)    |

AM, adenomyosis; TLR4, Toll-like receptor 4; NF- $\kappa$ B, nuclear factor  $\kappa$ -B; JAK2, Janus kinase 2; STAT3, signal transducer and activator of transcription 3; AKT, protein kinase B; mTOR, mammalian target of rapamycin; RAS, rat sarcoma virus; RAF, rapidly accelerated fibrosarcoma; MEK, mitogen-activated protein kinase kinase; ERK, extracellular regulated protein kinases; E2, estradiol; CXCL8, interleukin-8; CXCR1, C-X-C chemokine receptor type 1; FAK, focal adhesion kinase; VEGF, vascular endothelial growth factor; IL, interleukin; MyD88, myeloid differentiation primary response 88; COX-2, cyclooxygenase-2; PGE2, prostaglandin E2; CYP19A1, cytochrome P450 family 19 subfamily A member 1; uNK, Uterine natural killer cells; IVF, *in vitro* fertilization; HLA-G, human leukocyte antigen-G; ST2, suppression of tumorigenicity 2; HOXA10, homeobox A10; ER, endometrial receptivity; TGF- $\beta$ , transforming growth factor- $\beta$ ; EMT, epithelial-mesenchymal transition; FMT, fibroblast-myofibroblast transition; SMM, smooth muscle metaplasia; ECM, extracellular matrix; MMPs, matrix metalloproteinases; gp130, glycoprotein 130; LIF, leukemia inhibitory factor; CCL2, C-C motif chemokine ligand 2; CCR2, C-C chemokine receptor type 2; EV-LGMNP1, extracellular vesicle-derived long non-coding RNA gastric cancer metastasis-associated lncRNA 1; KIRs, killer cell immunoglobulin-like receptors; FGF, fibroblast growth factor; Th17, T helper 17 cells; Treg, regulatory T cells.

**Table SII.** Summary of drugs for the treatment of female infertility associated with adenomyosis based on inflammatory cytokines.

| <b>A, Non-steroidal anti-inflammatory drugs</b>             |                                                 |                                                              |                                                                                                                                                                                                                                                                                         |                |
|-------------------------------------------------------------|-------------------------------------------------|--------------------------------------------------------------|-----------------------------------------------------------------------------------------------------------------------------------------------------------------------------------------------------------------------------------------------------------------------------------------|----------------|
| <b>Medication</b>                                           | <b>Experimental model/study design</b>          | <b>Key drug targets</b>                                      | <b>Function</b>                                                                                                                                                                                                                                                                         | <b>(Refs.)</b> |
| Celecoxib                                                   | <i>In vitro</i> (ESCs) and clinical trial.      | COX-2, NF- $\kappa$ B and IL1B/IL-6/TNF                      | 1. Downregulates IL1B, IL-6, TNF and NF- $\kappa$ B expression;<br>2. Inhibits COX-2 and PGE2;<br>3. Improves inflammation-related pregnancy failure.                                                                                                                                   | (46,47)        |
| <b>B, Hormonotherapy</b>                                    |                                                 |                                                              |                                                                                                                                                                                                                                                                                         |                |
| <b>Medication</b>                                           | <b>Experimental model/study design</b>          | <b>Key drug targets</b>                                      | <b>Function</b>                                                                                                                                                                                                                                                                         | <b>(Refs.)</b> |
| GnRH-a                                                      | Clinical trial, mice, <i>in vitro</i> and ESCs. | GnRH receptor, IL1B/MCP-1/VEGF and HOXA10/HOXA11             | 1. Decreases IL1B, MCP-1 and VEGF;<br>2. Increases HOXA10, HOXA11, integrin $\beta$ 3 and LIF, improving the level of embryo implantation.                                                                                                                                              | (48-51)        |
| GnRH-A                                                      | Clinical trial.                                 | Pituitary GnRH receptor and pro-inflammatory cytokines       | 1. Blocks pituitary GnRH receptors (no “flare-up effect”);<br>2. Rapid ovarian function recovery;<br>3. Downregulates pro-inflammatory cytokines                                                                                                                                        | (50,52)        |
| Dienogest                                                   | <i>In vitro</i> , ESCs and clinical trial.      | HPO axis, IL-1 $\beta$ /IL-6/IL-8/TNF- $\alpha$ and NK cells | 1. Inhibits HPO axis (E2: 30-50 pg/ml);<br>2. Suppresses immunity, inflammation and angiogenesis;<br>3. Regulates key inflammatory cytokine expression (such as IL-1 $\beta$ , IL-6, IL-8, IL-10, IL-18, MCP-1 and TNF- $\alpha$ );<br>3. Increases NK cells (promote immune tolerance) | (53,54)        |
| <b>C, Immunomodulators - interleukin-targeted therapies</b> |                                                 |                                                              |                                                                                                                                                                                                                                                                                         |                |
| <b>Medication</b>                                           | <b>Experimental model/study design</b>          | <b>Key drug targets</b>                                      | <b>Function</b>                                                                                                                                                                                                                                                                         | <b>(Refs.)</b> |
| Tocilizumab                                                 | <i>In vitro</i> and ESCs.                       | IL-6 receptor and JAK2/STAT3                                 | 1. Inhibits exosome-induced cell proliferation and migration and induces G1/S cell cycle arrest;<br>2. Suppresses the IL-6/JAK2/STAT3 signaling pathway.                                                                                                                                | (55)           |
| AMY109                                                      | <i>In vivo</i> and monkey model.                | IL-8/MCP-1 and neutrophil chemokine receptors                | 1. Inhibits neutrophil recruitment;<br>2. Decreases IL-8 and MCP-1;<br>3. No impairment to ovarian function.                                                                                                                                                                            | (56,57)        |
| Metformin                                                   | <i>In vivo</i> (mice) and clinical trial.       | IL-6/IL-8, VEGF/MMP9 and LIF/HOXA10                          | 1. Reduces uterine volume and AM incidence;<br>2. Downregulates pro-inflammatory cytokines (IL-6 and IL-8) and angiogenic factors (VEGF and MMP9);<br>3. Upregulates LIF and HOXA10, enhances endometrial receptivity and supports successful pregnancy outcomes.                       | (58,59)        |
| Anakinra                                                    | Clinical trial.                                 | IL-1 receptor                                                | 1. Reduces VAS pain scores;                                                                                                                                                                                                                                                             | (60)           |

|                                                                             |                                                    |                                                                |                                                                                                                                                                                           |                |
|-----------------------------------------------------------------------------|----------------------------------------------------|----------------------------------------------------------------|-------------------------------------------------------------------------------------------------------------------------------------------------------------------------------------------|----------------|
|                                                                             |                                                    |                                                                | 2. No effect on ovulation/menstrual regularity.                                                                                                                                           |                |
| LXA4                                                                        | <i>In vivo</i> (mice).                             | IL1B/IL-6, COX-2, VEGF/HIF1A and TGF-β                         | 1. Downregulates proinflammatory cytokines IL1B and IL-6, COX-2 and PGE;<br>2. Decreases VEGF and HIF1A;<br>3. Regulates the TGF-β subtypes, decreases lesion size and improves fertility | (61,62)        |
| <b>D, Immunomodulators - NF-κB Inhibitors</b>                               |                                                    |                                                                |                                                                                                                                                                                           |                |
| <b>Medication</b>                                                           | <b>Experimental model/study design</b>             | <b>Key drug targets</b>                                        | <b>Function</b>                                                                                                                                                                           | <b>(Refs.)</b> |
| Disulfiram                                                                  | <i>In vivo</i> (rats)                              | NF-κB (nuclear translocation) and VEGF-A/MMP2                  | 1. Decreases total antioxidant status, TNF-α and IL-1β;<br>2. Inhibits NF-κB;<br>3. Downregulates VEGF-A and MMP2 expression;<br>4. Reduces postoperative inflammatory adhesions.         | (63,64)        |
| Melatonin                                                                   | <i>In vivo</i> (mouse)                             | ROS, TNF/IL1B, NF-κB and VEGF                                  | 1. Inhibits ROS, TNF and IL1B (suppress NF-κB);<br>2. Increases the expression of VEGF;<br>3. Alleviates uterine oxidative damage.                                                        | (65,66)        |
| <b>E, Immunomodulators - TNF-α inhibitors</b>                               |                                                    |                                                                |                                                                                                                                                                                           |                |
| <b>Medication</b>                                                           | <b>Experimental model/study design</b>             | <b>Key drug targets</b>                                        | <b>Function</b>                                                                                                                                                                           | <b>(Refs.)</b> |
| Etanercept                                                                  | <i>In vivo</i> (baboon) and <i>in vitro</i> (rat). | TNF-α and VEGF/IL-6                                            | 1. Downregulates VEGF, IL-6 and TNF;<br>2. Reduces lesion volume;<br>3. Improves pregnancy outcomes.                                                                                      | (67-69)        |
| Pentoxifylline                                                              | <i>In vivo</i> (rat) and <i>in vivo</i> (human).   | IL1B and TNF                                                   | 1. Downregulates IL1B, TNF and other inflammatory cytokines;<br>2. Alleviates postoperative pain;<br>3. Improves pregnancy outcomes.                                                      | (70,71)        |
| <b>F, Development of new technologies - specialized targeting materials</b> |                                                    |                                                                |                                                                                                                                                                                           |                |
| <b>Medication</b>                                                           | <b>Experimental model/study design</b>             | <b>Key drug targets</b>                                        | <b>Function</b>                                                                                                                                                                           | <b>(Refs.)</b> |
| Intralipid                                                                  | <i>In vitro</i> (NK cells).                        | NK cell activity (immunoreceptors)                             | 1. Suppresses NK cell activity (anti-inflammatory and immunosuppressive effects);<br>2. Increases live birth rates;<br>3. Improves adverse pregnancy outcomes.                            | (72-74)        |
| Nanoparticles                                                               | <i>In vivo</i> and human                           | IL-4 plasmid (macrophages), ROS and oocyte protective proteins | 1. Targeted delivery of IL-4 (reverse M2 polarization);<br>2. Eliminates ROS to inhibit angiogenesis and protect oocytes.                                                                 | (75-78)        |

|                                        |                                                   |                                                                                  |                                                                                                                                                                                                               |                |
|----------------------------------------|---------------------------------------------------|----------------------------------------------------------------------------------|---------------------------------------------------------------------------------------------------------------------------------------------------------------------------------------------------------------|----------------|
| MicroRNA                               | <i>In vitro</i> and ESCs.                         | NF- $\kappa$ B (miR-182), IKK $\beta$ (miR-199a) and IL-8                        | 1. miR-182 inhibits proliferation, migration, invasion and EMT (suppress NF- $\kappa$ B);<br>2. miR-199a targets IKK $\beta$ (inhibits NF- $\kappa$ B/IL-8).                                                  | (23,79-83)     |
| <b>G, Traditional Chinese Medicine</b> |                                                   |                                                                                  |                                                                                                                                                                                                               |                |
| <b>Medication</b>                      | <b>Experimental model/study design</b>            | <b>Key drug targets</b>                                                          | <b>Function</b>                                                                                                                                                                                               | <b>(Refs.)</b> |
| Paeoniflorin sodium                    | <i>In vitro</i> and ESCs                          | PGE2 and PGF2 $\alpha$ (prostaglandin synthases)                                 | 1. Reduces PGE2 and PGF2 $\alpha$ ;<br>2. Alleviates lesion inflammation.                                                                                                                                     | (84)           |
| Resveratrol                            | <i>In vivo</i> (mice) and <i>in vivo</i> (human). | COX-2 and aromatase (CYP19A1)                                                    | 1. Inhibits myometrial infiltration and pain (no hormonal homeostasis);<br>2. Downregulates COX-2 and aromatase expression.                                                                                   | (85)           |
| Oleuropein                             | <i>In vivo</i> (mice).                            | ER $\beta$ , NLRP3 inflammasome, TNF $\alpha$ /NF- $\kappa$ B and IL-6/JAK/STAT3 | 1. Inhibits ER $\beta$ /NLRP3 (suppresses IL-1 $\beta$ );<br>2. Regulates multiple signaling pathways, including TNF $\alpha$ /NF- $\kappa$ B, ROS and IL-6/JAK/STAT3;<br>3. Repairs decidualization defects. | (86,87)        |
| Quercetin                              | <i>In vitro</i> and ESCs.                         | Fascin/ezrin and MMP-2/MMP-9 (invasion proteins)                                 | 1. Inhibits ectopic ESC migration and invasion (dose-dependent);<br>2. Downregulates invasion-related proteins such as fascin, ezrin and MMP-2/MMP-9.                                                         | (88)           |
| Tanshinone IIA sulfonate               | <i>In vivo</i> (rats),                            | TGF- $\beta$ 1/Smad3/NF- $\kappa$ B;                                             | Sodium tanshinone IIA sulfonate inhibits platelet aggregation and suppresses the TGF- $\beta$ 1/Smad3 and NF- $\kappa$ B signaling pathways, thus attenuating fibrosis.                                       | (89)           |
| Rhein                                  | <i>In vivo</i> (mice)                             | NF- $\kappa$ B/Wnt/ $\beta$ -catenin                                             | Rhein reduces IL-1 $\beta$ -induced NF- $\kappa$ B expression and inhibits Wnt/ $\beta$ -catenin; exerts anti-inflammatory/fibrotic effect.                                                                   | (50)           |
| Berberine                              | <i>In vitro</i> and EESC.                         | IL-6/IL-8 and ESC proliferation                                                  | Berberine reduces invasiveness, downregulates IL-6 and IL-8 and promotes ESCs apoptosis.                                                                                                                      | (90)           |

COX-2, cyclooxygenase-2; CYP19A1, cytochrome P450 family 19 subfamily A member 1; E2, estradiol; EMT, epithelial-mesenchymal transition; EESC, ectopic endometrial stromal cells; ESCs, endometrial stromal cells; Er $\beta$ , estrogen receptor  $\beta$ ; GnRH-a, gonadotropin-releasing hormone agonist; GnRH-A, gonadotropin-releasing hormone antagonist; HIF1A, hypoxia-inducible factor 1  $\alpha$ ; HPO, hypothalamic-pituitary-ovarian; HOXA10, homeobox A10; HOXA11, homeobox A11; IKK $\beta$ , I $\kappa$ B kinase  $\beta$ ; IL, interleukin; JAK, Janus kinase; STAT3, signal transducer and activator of transcription 3; LIF, leukemia inhibitory factor; MCP-1, monocyte chemoattractant protein-1; MMP, Matrix Metalloproteinase; miR, microRNA; NK cells, natural killer cells; NLRP3, nod-like receptor family pyrin domain containing 3; PGE2, prostaglandin E2; PGF2 $\alpha$ , prostaglandin F2  $\alpha$ ; ROS, reactive oxygen species; TGF- $\beta$ , transforming growth factor- $\beta$ ; TNF, tumor necrosis factor; VEGF, vascular endothelial growth factor.

## References

1. Zhihong N, Yun F, Pinggui Z, Sulian Z and Zhang A: Cytokine profiling in the eutopic endometrium of adenomyosis during the implantation window after ovarian stimulation. *Reprod Sci* 23: 124-133, 2016.
2. Incognito GG, Di Guardo F, Gulino FA, Genovese F, Benvenuto D, Lello C and Palumbo M: Interleukin-6 as a useful predictor of endometriosis-associated infertility: A systematic review. *Int J Fertil Steril* 17: 226-230, 2023.
3. Wei LH, Kuo ML, Chen CA, Chou CH, Lai KB, Lee CN and Hsieh CY: Interleukin-6 promotes cervical tumor growth by VEGF-dependent angiogenesis via a STAT3 pathway. *Oncogene* 22: 1517-1527, 2003.
4. Guo J, Chen L, Luo N, Li C, Chen R, Qu X, Liu M, Kang L and Cheng Z: LPS/TLR4-mediated stromal cells acquire an invasive phenotype and are implicated in the pathogenesis of adenomyosis. *Sci Rep* 6: 21416, 2016.
5. Liu XN and Cheng ZP: Expression of high-mobility group box-1 in eutopic/ectopic endometrium and correlations with inflammation-related factors in adenomyosis. *Gynecol Endocrinol* 39: 2269265, 2023.
6. Ulukus EC, Ulukus M, Seval Y, Zheng W and Arici A: Expression of interleukin-8 and monocyte chemoattractant protein-1 in adenomyosis. *Hum Reprod* 20: 2958-2963, 2005.
7. Zheng D, Duan H, Wang S, Xu Q, Gan L, Li J and Dong Q: FAK regulates epithelial-mesenchymal transition in adenomyosis. *Mol Med Rep* 18: 5461-5472, 2018.
8. Kataranovski M, Radojčić L, Prokić V and Vojvodić D: Presence of interleukin-8 and the IL-1 receptor antagonist in the cervical mucus of fertile and infertile women. *Vojnosanit Pregl* 61: 359-364, 2004.
9. De Nardo D: Toll-like receptors: Activation, signalling and transcriptional modulation. *Cytokine* 74: 181-189, 2015.
10. Dinarello CA: Immunological and inflammatory functions of the interleukin-1 family. *Annu Rev Immunol* 27: 519-550, 2009.
11. Equils O, Kellogg C, McGregor J, Gravett M, Neal-Perry G and Gabay C: The role of the IL-1 system in pregnancy and the use of IL-1 system markers to identify women at risk for pregnancy complications†. *Biol Reprod* 103: 684-694, 2020.
12. Wang H, Shi G, Li M, Fan H, Ma H and Sheng L: Correlation of IL-1 and HB-EGF with endometrial receptivity. *Exp Ther Med* 16: 5130-5136, 2018.
13. Faber BM, Chegini N, Mahony MC and Coddington CC III: Macrophage secretory products and sperm zona pellucida binding. *Obstet Gynecol* 98: 668-673, 2001.
14. Li C, Chen R, Jiang C, Chen L and Cheng Z: Correlation of LOX-5 and COX-2 expression with inflammatory pathology and clinical features of adenomyosis. *Mol Med Rep* 19: 727-733, 2019.
15. Zhang J, Shi L, Duan J, Li M and Li C: Proteomic detection of COX-2 pathway-related factors in patients with adenomyosis. *PeerJ* 12: e16784, 2024.

16. Yang XJ, Yang J, Liu Z, Yang G and Shen ZJ: Telocytes damage in endometriosis-affected rat oviduct and potential impact on fertility. *J Cell Mol Med* 19: 452-462, 2015.
17. Mechsner S, Grum B, Gericke C, Loddenkemper C, Dudenhausen JW and Ebert AD: Possible roles of oxytocin receptor and vasopressin-1 $\alpha$  receptor in the pathomechanism of dysperistalsis and dysmenorrhea in patients with adenomyosis uteri. *Fertil Steril* 94: 2541-2546, 2010.
18. Godbole G and Modi D: Regulation of decidualization, interleukin-11 and interleukin-15 by homeobox A 10 in endometrial stromal cells. *J Reprod Immunol* 85: 130-139, 2010.
19. Chegini N, Roberts M and Ripps B: Differential expression of interleukins (IL)-13 and IL-15 in ectopic and eutopic endometrium of women with endometriosis and normal fertile women. *Am J Reprod Immunol* 49: 75-83, 2003.
20. Wang Q, Wang L, Shao J, Wang Y, Jin LP, Li DJ and Li MQ: L-22 enhances the invasiveness of endometrial stromal cells of adenomyosis in an autocrine manner. *Int J Clin Exp Pathol* 7: 5762-5771, 2014.
21. Heidari Z, Moudi B, Sheibak N, Asemi-Rad A, Keikha N, Mahmoudzadeh-Sagheb H and Ghasemi M: Interleukin 22 expression during the implantation window in the endometrium of women with unexplained recurrent pregnancy loss and unexplained infertility compared to healthy parturient individuals. *J Interferon Cytokine Res* 41: 461-468, 2021.
22. Shang WQ, Yu JJ, Zhu L, Zhou WJ, Chang KK, Wang Q and Li MQ: Blocking IL-22, a potential treatment strategy for adenomyosis by inhibiting crosstalk between vascular endothelial and endometrial stromal cells. *Am J Transl Res* 7: 1782-1797, 2015.
23. Wu M and Zhang Y: MiR-182 inhibits proliferation, migration, invasion and inflammation of endometrial stromal cells through deactivation of NF- $\kappa$ B signaling pathway in endometriosis. *Mol Cell Biochem* 476: 1575-1588, 2021.
24. Xu L, Yu Y, Sang R, Ge B, Wang M, Zhou H and Zhang X: Inonotus obliquus polysaccharide protects against adverse pregnancy caused by *Toxoplasma gondii* infection through regulating Th17/Treg balance via TLR4/NF- $\kappa$ B pathway. *Int J Biol Macromol* 146: 832-840, 2020.
25. Nakamura H, Kimura T, Ogita K, Nakamura T, Takemura M, Shimoya K, Koyama S, Tsujie T, Koyama M and Murata Y: NF-kappaB activation at implantation window of the mouse uterus. *Am J Reprod Immunol* 51: 16-21, 2004.
26. Balkwill FR, Capasso M and Hagemann T: The tumor microenvironment at a glance. *J Cell Sci* 125: 5591-5596, 2012.
27. Thellin O, Coumans B, Zorzi W, Igout A and Heinen E: Tolerance to the foeto-placental 'graft': Ten ways to support a child for nine months. *Curr Opin Immunol* 12: 731-737, 2000.
28. Wang J, Huang C, Jiang R, Du Y, Zhou J, Jiang Y, Yan Q, Xing J, Hou X, Zhou J, *et al*: Decreased endometrial IL-10 impairs endometrial receptivity by downregulating HOXA10 expression in women with adenomyosis. *Biomed Res Int* 2018: 2549789, 2018.

29. Sowmya S, Sri Manjari K, Ramaiah A, Sunitha T, Nallari P, Jyothy A and Venkateshwari A: Interleukin 10 gene promoter polymorphisms in women with early-onset pre-eclampsia. *Clin Exp Immunol* 178: 334-341, 2014.
30. He B, Teng XM, Hao F, Zhao M, Chen ZQ, Li KM and Yan Q: Decreased intracellular IL-33 impairs endometrial receptivity in women with adenomyosis. *Front Endocrinol (Lausanne)* 13: 928024, 2022.
31. Zhang H, Li C, Li W, Xin W and Qin T: Research advances in adenomyosis-related signaling pathways and promising targets. *Biomolecules* 14: 1402, 2024.
32. Kay N, Huang CY, Shiu LY, Yu YC, Chang Y, Schatz F, Suen JL, Tsai EM and Huang SJ: TGF- $\beta$ 1 neutralization improves pregnancy outcomes by restoring endometrial receptivity in mice with adenomyosis. *Reprod Sci* 28: 877-887, 2021.
33. Wang T, Yuan J, Zhang J, Tian R, Ji W, Zhou Y, Yang Y, Song W, Zhang F and Niu R: Anxa2 binds to STAT3 and promotes epithelial to mesenchymal transition in breast cancer cells. *Oncotarget* 6: 30975-30992, 2015.
34. Gellersen B and Brosens JJ: Cyclic decidualization of the human endometrium in reproductive health and failure. *Endocr Rev* 35: 851-905, 2014.
35. Kuivasaari P, Hippeläinen M, Anttila M and Heinonen S: Effect of endometriosis on IVF/ICSI outcome: Stage III/IV endometriosis worsens cumulative pregnancy and live-born rates. *Hum Reprod* 20: 3130-3135, 2005.
36. Salleh N and Giribabu N: Leukemia inhibitory factor: Roles in embryo implantation and in nonhormonal contraception. *ScientificWorldJournal* 2014: 201514, 2014.
37. Itoh F, Komohara Y, Takaishi K, Honda R, Tashiro H, Kyo S, Katabuchi H and Takeya M: Possible involvement of signal transducer and activator of transcription-3 in cell-cell interactions of peritoneal macrophages and endometrial stromal cells in human endometriosis. *Fertil Steril* 99: 1705-1713, 2013.
38. Huang Y, Zhu L, Li H, Ye J, Lin N, Chen M, Pan D and Chen Z: Endometriosis derived exosomal miR-301a-3p mediates macrophage polarization via regulating PTEN-PI3K axis. *Biomed Pharmacother* 147: 112680, 2022.
39. Sun SG, Guo JJ, Qu XY, Tang XY, Lin YY, Hua KQ and Qiu JJ: The extracellular vesicular pseudogene LGMNP1 induces M2-like macrophage polarization by upregulating LGMN and serves as a novel promising predictive biomarker for ovarian endometriosis recurrence. *Hum Reprod* 37: 447-465, 2022.
40. Zhang D, Yu Y, Duan T and Zhou Q: The role of macrophages in reproductive-related diseases. *Heliyon* 8: e11686, 2022.
41. Díaz-Hernández I, Alecsandru D, García-Velasco JA and Domínguez F: Uterine natural killer cells: From foe to friend in reproduction. *Hum Reprod Update* 27: 720-746, 2021.
42. Shi J, Xu Q, Yu S and Zhang T: Perturbations of the endometrial immune microenvironment in endometriosis and adenomyosis: Their impact on reproduction and pregnancy. *Semin Immunopathol* 47: 16, 2025.

43. Mei J, Zhou WJ, Zhu XY, Lu H, Wu K, Yang HL, Fu Q, Wei CY, Chang KK, Jin LP, *et al*: Suppression of autophagy and HCK signaling promotes PTGS2<sup>high</sup> FCGR3<sup>+</sup> NK cell differentiation triggered by ectopic endometrial stromal cells. *Autophagy* 14: 1376-1397, 2018.
44. Niu W, Zhang Y, Liu H, Liang N, Xu L, Li Y, Yao W, Shi W and Liu Z: Single-cell profiling uncovers the roles of endometrial fibrosis and microenvironmental changes in adenomyosis. *J Inflamm Res* 16: 1949-1965, 2023.
45. Hoe E, Anderson J, Nathanielsz J, Toh ZQ, Marimla R, Balloch A and Licciardi PV: The contrasting roles of Th17 immunity in human health and disease. *Microbiol Immunol* 61: 49-56, 2017.
46. Olivares C, Bilotas M, Buquet R, Borghi M, Sueldo C, Tesone M and Meresman G: Effects of a selective cyclooxygenase-2 inhibitor on endometrial epithelial cells from patients with endometriosis. *Hum Reprod* 23: 2701-2708, 2008.
47. Nyachieo A, Siristatidis CS and Vaidakis D: Nonsteroidal anti-inflammatory drugs for assisted reproductive technology. *Cochrane Database Syst Rev* 10: CD007618, 2019.
48. Zippel AL, Kyvelidou C, Frank M, Gapp E, Reiser E, Braun AS, Feil K, Schuchter S, Rockenschaub P, Toth B and Seeber B: The impact of GnRH agonists on endometrial immune cells in patients with adenomyosis: A prospective cohort study. *BMC Med* 23: 338, 2025.
49. Khan KN, Kitajima M, Hiraki K, Fujishita A, Sekine I, Ishimaru T and Masuzaki H: Changes in tissue inflammation, angiogenesis and apoptosis in endometriosis, adenomyosis and uterine myoma after GnRH agonist therapy. *Hum Reprod* 25: 642-653, 2010.
50. Guo S, Li Z, Yan L, Sun Y and Feng Y: GnRH agonist improves pregnancy outcome in mice with induced adenomyosis by restoring endometrial receptivity. *Drug Des Devel Ther* 12: 1621-1631, 2018.
51. Wang PH, Liu WM, Fuh JL, Cheng MH and Chao HT: Comparison of surgery alone and combined surgical-medical treatment in the management of symptomatic uterine adenomyoma. *Fertil Steril* 92: 876-885, 2009.
52. Barretta M, Vignali M, La Marca A and Grandi G: The oral GnRH antagonists, a new class of drugs in gynecology: From pharmacokinetics to possible clinical applications. *Expert Opin Drug Metab Toxicol*: 1-13, 2024 (Epub ahead of print).
53. Horie S, Harada T, Mitsunari M, Taniguchi F, Iwabe T and Terakawa N: Progesterone and progestational compounds attenuate tumor necrosis factor alpha-induced interleukin-8 production via nuclear factor kappa B inactivation in endometriotic stromal cells. *Fertil Steril* 83: 1530-1535, 2005.
54. Prathoomthong S, Tingthanatikul Y, Lertvikool S, Rodratn N, Waiyaput W, Dittharot K, Sroyraya M and Sophonsritsuk A: The effects of dienogest on macrophage and natural killer cells in adenomyosis: A randomized controlled study. *Int J Fertil Steril* 11: 279-286, 2018.
55. Jiang X and Chen X: Endometrial cell-derived exosomes facilitate the development of adenomyosis via the IL-6/JAK2/STAT3 pathway. *Exp Ther Med* 26: 526, 2023.

56. Yamamoto N, Kitano S, Koyama T, Ikeda M, Mizugaki H, Narikiyo T, Yamaguchi Y, Ishida T, Takubo R, Ogami C, *et al*: Phase I study of the safety and clinical activity of the interleukin-8 inhibitor AMY109 combined with atezolizumab in patients with advanced solid cancers. *J Immunother Cancer* 12: e009262, 2024.
57. Nishimoto-Kakiuchi A, Sato I, Nakano K, Ohmori H, Kayukawa Y, Tanimura H, Yamamoto S, Sakamoto Y, Nakamura G, Maeda A, *et al*: A long-acting anti-IL-8 antibody improves inflammation and fibrosis in endometriosis. *Sci Transl Med* 15: eabq5858, 2023.
58. Cheng J, Li C, Ying Y, Lv J, Qu X, McGowan E, Lin Y and Zhu X: Metformin alleviates endometriosis and potentiates endometrial receptivity via decreasing VEGF and MMP9 and increasing leukemia inhibitor factor and HOXA10. *Front Pharmacol* 13: 750208, 2022.
59. Hou Y, Qin Z, Fan K, Xu Y and Huang X: Combination therapeutic effects of high intensity focused ultrasound and Metformin for the treatment of adenomyosis. *Exp Ther Med* 15: 2104-2108, 2018.
60. Sullender RT, Agarwal RK, Jacobs MB, Wessels JM, Foster WG and Agarwal SK: Pilot study of IL-1 antagonist anakinra for treatment of endometriosis. *Int J Womens Health* 16: 1583-1593, 2024.
61. Xu Z, Zhao F, Lin F, Chen J and Huang Y: Lipoxin A4 inhibits the development of endometriosis in mice: The role of anti-inflammation and anti-angiogenesis. *Am J Reprod Immunol* 67: 491-497, 2012.
62. Kumar R, Clerc AC, Gori I, Russell R, Pellegrini C, Govender L, Wyss JC, Golshayan D and Canny GO: Lipoxin A4 prevents the progression of de novo and established endometriosis in a mouse model by attenuating prostaglandin E2 production and estrogen signaling. *PLoS One* 9: e89742, 2014.
63. Celik O, Ersahin A, Acet M, Celik N, Baykus Y, Deniz R, Ozerol E and Ozerol I: Disulfiram, as a candidate NF- $\kappa$ B and proteasome inhibitor, prevents endometriotic implant growing in a rat model of endometriosis. *Eur Rev Med Pharmacol Sci* 20: 4380-4389, 2016.
64. Akdaş Reis Y, Tapisiz OL, Göktolga Ü, Şimşek G, Erten Ö, Kiykaç Altınbaş Ş and Erkaya S: The effect of disulfiram in the prevention of postoperative adhesion formation in an experimental rat uterine horn model. *Reprod Sci* 28: 2650-2660, 2021.
65. Guan X, Liu D, Zhou H, Dai C, Wang T, Fang Y, Jia Y and Li K: Melatonin improves pregnancy outcomes in adenomyosis mice by restoring endometrial receptivity via NF-kappaB/apoptosis signaling. *Ann Transl Med* 10: 1317, 2022.
66. Chuffa LGDA, Lupi LA, Cuciello MS, Silveira HS, Reiter RJ and Seiva FRF: Melatonin promotes uterine and placental health: Potential molecular mechanisms. *Int J Mol Sci* 21: 300, 2019.
67. Barrier BF, Bates GW, Leland MM, Leach DA, Robinson RD and Propst AM: Efficacy of anti-tumor necrosis factor therapy in the treatment of spontaneous endometriosis in baboons. *Fertil Steril* 81 (Suppl 1): S775-S779, 2004.
68. Zulfikaroglu E, Kilic S, Islimye M, Aydin M, Zergeroğlu S and Batioglu S: Efficacy of anti-tumor necrosis factor therapy on endometriosis in an experimental rat model. *Arch Gynecol Obstet* 283: 799-804, 2011.

69. Önalın G, Tohma YA and Zeynelođlu HB: Effect of etanercept on the success of assisted reproductive technology in patients with endometrioma. *Gynecol Obstet Inves* 83: 358-364, 2018.
70. Etemadi S, Abtahi Froushani SM, Hashemi Asl SM and Mahmoudian A: Combined atorvastatin and pentoxifylline in ameliorating inflammation induced by complete Freund's adjuvant. *Inflammopharmacology* 30: 935-944, 2022.
71. Creus M, Fábregues F, Carmona F, del Pino M, Manau D and Balasch J: Combined laparoscopic surgery and pentoxifylline therapy for treatment of endometriosis-associated infertility: A preliminary trial. *Hum Reprod* 23: 1910-1916, 2008.
72. Roussev RG, Ng SC and Coulam CB: Natural killer cell functional activity suppression by intravenous immunoglobulin, intralipid and soluble human leukocyte antigen-G. *Am J Reprod Immunol* 57: 262-269, 2007.
73. Coulam CB: Intralipid treatment for women with reproductive failures. *Am J Reprod Immunol* 85: e13290, 2021.
74. Etrusco A, Barra F, Chiantera V, Ferrero S, Bogliolo S, Evangelisti G, Oral E, Pastore M, Izzotti A, Venezia R, *et al*: Current medical therapy for adenomyosis: From bench to bedside. *Drugs* 83: 1595-1611, 2023.
75. Wang H, Gan Z, Wang Y, Hu D, Zhang L, Ye F and Duan P: A noninvasive menstrual blood-based diagnostic platform for endometriosis using digital droplet enzyme-linked immunosorbent assay and single-cell RNA sequencing. *Research (Wash D C)* 8: 0652, 2025.
76. Moses AS, Taratula OR, Lee H, Luo F, Grenz T, Korzun T, Lorenz AS, Sabei FY, Bracha S, Alani AWG, *et al*: Nanoparticle-based platform for activatable fluorescence imaging and photothermal ablation of endometriosis. *Small* 16: e1906936, 2020.
77. Wu N, Han Z, Lv W, Huang Y, Zhu J, Deng J and Xue Q: Reprogramming peritoneal macrophages with outer membrane vesicle-coated PLGA nanoparticles for endometriosis prevention. *Biomaterials* 319: 123198, 2025.
78. Yuxue J, Ran S, Minghui F and Minjia S: Applications of nanomaterials in endometriosis treatment. *Front Bioeng Biotechnol* 11: 1184155, 2023.
79. Zhu Y, Zheng B, Zhang Y, Li M, Jiang Y, Zhou J, Zhang Y, Kang N, Wu M, Yan Y, *et al*: Ectopic endometrial stromal cell-derived extracellular vesicles encapsulating microRNA-25-3p induce endometrial collagen I deposition impairing decidualization in endometriosis. *Mol Hum Reprod* 30: gaae042, 2024.
80. Mari-Alexandre J, Barceló-Molina M, Belmonte-López E, García-Oms J, Estellés A, Braza-Boils A and Gilabert-Estellés J: Micro-RNA profile and proteins in peritoneal fluid from women with endometriosis: Their relationship with sterility. *Fertil Steril* 109: 675-684.e2, 2018.
81. Dai L, Gu L and Di W: MiR-199a attenuates endometrial stromal cell invasiveness through suppression of the IKK $\beta$ /NF- $\kappa$ B pathway and reduced interleukin-8 expression. *Mol Hum Reprod* 18: 136-145, 2012.
82. Abdulmonem WA, Ahsan M, Mallick AK, Mohamed AH, Waggiallah HA, Shafie A, Alzahrani HS, Ashour AA, Rab SO, Mirdad MT and Ali HTO: The role of exosomal miRNAs in female infertility: Therapeutic potential and mechanisms of action. *Stem Cell Rev Rep* 21: 1141-1159, 2025.

83. Juárez-Barber E, Segura-Benítez M, Carbajo-García MC, Bas-Rivas A, Faus A, Vidal C, Giles J, Labarta E, Pellicer A, Cervelló I and Ferrero H: Extracellular vesicles secreted by adenomyosis endometrial organoids contain miRNAs involved in embryo implantation and pregnancy. *Reprod Biomed Online* 46: 470-481, 2023.
84. Guan YG, Liao JB, Li KY, Li YC, Song Y, Ling J and Su ZR: Potential mechanisms of an antiadenomyosis chinese herbal formula shaoyao-gancao decoction in primary cell culture model. *Evid Based Complement Alternat Med* 2014: 982913, 2014.
85. Maia H Jr, Haddad C, Pinheiro N and Casoy J: Advantages of the association of resveratrol with oral contraceptives for management of endometriosis-related pain. *Int J Womens Health* 4: 543-549, 2012.
86. Han SJ, Jung SY, Wu SP, Hawkins SM, Park MJ, Kyo S, Qin J, Lydon JP, Tsai SY, Tsai MJ, *et al*: Estrogen receptor  $\beta$  modulates apoptosis complexes and the inflammasome to drive the pathogenesis of endometriosis. *Cell* 163: 960-974, 2015.
87. Park Y, Cho YJ, Sung N, Park MJ, Guan X, Gibbons WE, O'Malley BW and Han SJ: Oleuropein suppresses endometriosis progression and improves the fertility of mice with endometriosis. *J Biomed Sci* 29: 100, 2022.
88. Xu W, Song Y, Li K, Zhang B and Zhu X: Quercetin inhibits adenomyosis by attenuating cell proliferation, migration and invasion of ectopic endometrial stromal cells. *Drug Des Devel Ther* 14: 3815-3826, 2020.
89. Jiang X, Chen Y, Zhu H, Wang B, Qu P, Chen R and Sun X: Sodium tanshinone IIA sulfonate ameliorates bladder fibrosis in a rat model of partial bladder outlet obstruction by inhibiting the TGF- $\beta$ /Smad pathway activation. *PLoS One* 10: e129655, 2015.
90. Liu L, Chen L, Jiang C, Guo J, Xie Y, Kang L and Cheng Z: Berberine inhibits the LPS-induced proliferation and inflammatory response of stromal cells of adenomyosis tissues mediated by the LPS/TLR4 signaling pathway. *Exp Ther Med* 14: 6125-6130, 2017.
